# Supplementary material for: Growth Arrest of Alveolar Cells in Response to Cytokines from Spike S1-Activated Macrophages: Role of IFN-γ
Source: MDPI journal article supplement (doi:10.3390/biomedicines10123085), 2022-12-01
Supplement: s1 [file s1]

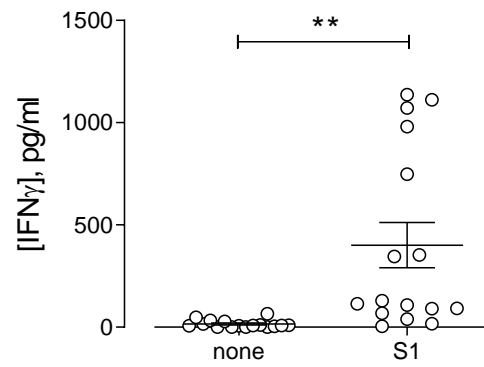

**Figure S1.** Monocyte derived macrophages (MDM) were left untreated (none) or incubated for 24 h with 5 nM spike S1 protein (S1). IFN- $\gamma$  released in the medium were quantified with an ELISA assay, as described in Methods. Data are means  $\pm$  SEM of sixteen independent experiments (single dots). \*\*p < 0.01 vs. none with paired Student's t test.
